# Supplementary material for: Inorganic and organic geochemical fingerprinting of sediment sources and ocean circulation on a complex continental margin (São Paulo Bight, Brazil)
Source: Copernicus journal article supplement (doi:10.5194/os-2016-86), 2016-11-21
Supplement: Supplementary file 2 [file SuppMat2.xlsx]

## Sheet: Plan1
Supp. Mat. 2. Contents (mg.kg-1) of the metals analyzed in this work
Sample	Water Depth	Core Depth	Al	Fe	Ca	Mg	Ti	Ba	K	Sc	Sr	V
60-0	-16	0	44852	25854.4	61587.7	9201	4790.66	247.449	15253.7	5.70806	332.437	43.2017
61-2 0-1	-60	1	48770.3	25120.8	36079.1	9933.57	4199.5	282.652	16708.6	6.3045	171.75	49.1091
61-2 1-2	-60	2	37328.1	18874.7	27608.5	7969.81	3163.04	217.4	12266.5	5.02342	136.85	38.3733
61-2 2-3	-60	3	50893.4	26239.6	36047.7	10262.5	4029.2	244.403	16516.5	6.03463	159.507	46.5443
61-2 3-4	-60	4	45083	24428.3	32401.1	9468.46	3730.4	255.237	15234.8	6.06013	159.43	49.3171
61-2 4-5	-60	5	50741.1	26273.5	32082.1	10413	3933.06	242.237	15696.2	6.47596	155.779	49.2735
61-2 5-6	-60	6	49521	25209.1	31380.7	9822.64	3858.74	250.406	15614.4	6.52014	154.333	49.1738
61-2 6-7	-60	7	59021.1	29974	35801.4	11571.1	4493.96	265.176	17899.7	7.65187	172.661	56.0174
61-2 7-8	-60	8	62558.4	31971.4	37730.4	12420.7	4855.06	266.07	18931.2	7.66812	173.053	57.2505
61-2 8-9	-60	9	64680.3	33024.4	37241.9	12744.8	4789.28	257.206	19024.1	8.05573	172.848	59.1544
61-2 9-10	-60	10	69974.1	36194.6	39607.9	13847.2	5220.34	262.752	20706.3	8.32378	176.644	61.1178
61-2 10-11	-60	11	59031.8	30775.8	33918.8	11604.5	4580.58	259.392	17877.4	7.95387	170.432	59.9125
61-2 11-12	-60	12	57539.9	29880.8	35138.5	11345.7	4391.97	259.873	17343.4	7.85103	174.86	58.3245
61-2 12-13	-60	13	58601.7	30183.7	33609.9	11497.1	4465.75	260.27	17768.6	7.57333	169.486	56.5389
61-2 13-14	-60	14	56464	28740.1	31312.8	10984.2	4210.19	255.815	17153.9	7.27835	159.567	54.6098
61-2 14-15	-60	15	57593.1	29373.8	32534.7	11308	4252.9	248.686	17360.7	7.25104	159.913	54.0459
61-2 15-16	-60	16	62748.4	32847.6	33719.8	12475.3	4634.19	236.632	18085.5	7.90236	160.066	58.7706
61-2 16-17	-60	17	60576.2	31560.9	33681.5	12116.9	4515.53	251.432	17489.3	8.02599	167.429	60.4771
61-2 17-18	-60	18	57145.7	29489.4	33168.4	11319	4181.98	244.574	16946.7	7.51257	162.552	56.6759
61-2 18-19	-60	19	73935.3	38306.3	40427.5	14347.6	5444.6	302.863	21823.2	9.70765	201.728	73.6944
61-2 19-20	-60	20	63874.1	35042.8	37816	12355.9	4951.88	241.228	20023.6	6.69347	161.364	57.4358
61-2 20-21	-60	21	66510.1	34393.3	36886.2	13157.7	4811.11	252.152	19596.9	8.01527	169.526	60.64
61-2 21-22	-60	22	60731	31608.1	33809.5	12226.5	4459.45	251.293	17588	8.12075	171.601	61.5502
61-2 22-23	-60	23	60838.1	31778.8	33571	12133.5	4530.92	240.684	17650.9	7.867	162.024	58.6851
61-0	-60	0	56505.3	29601.8	32530.3	11762.9	4226.18	242.535	16964.5	7.24811	163.579	57.8376
62-2 0-1	-121	0	43441	20904.3	80205.9	8152.01	3190.12	190.598	15078.6	3.96687	304.557	30.071
62-2 2-3	-121	2	34104.3	16705.9	65136.4	6369.84	2461.2	182.908	11326.6	4.07059	291.952	30.8277
62-2 4-5	-121	4	34988.4	17426.5	65426.5	6526.58	2527.42	183.574	11832.9	4.02475	283.78	31.2283
62-2 6-7	-121	6	38299.2	18689.8	68897.5	7141.83	2745	182.065	12821.5	3.96996	277.509	30.755
62-2 8-9	-121	8	33546.7	16343	60755.7	6097.51	2494.61	186.609	11220.7	4.01513	286.41	30.9468
62-2 10-11	-121	10	35659.1	17284.7	61655.1	6595.78	2445.77	177.375	11017.2	4.45713	288.553	33.289
62-2 12-13	-121	12	43841.8	21140.4	72635.1	7855.33	3078.98	180.65	14300.3	4.48072	287.079	33.4419
62-2 14-15	-121	14	43610.2	21707.6	68625	8128.48	2913.54	171.078	12548.1	5.55529	305.097	41.0641
62-2 16-17	-121	16	37877.1	18526.4	63529.2	7044.93	2601.38	177.669	11598	4.85189	287.109	35.4118
62-2 18-19	-121	18	40399	20379.6	66751	7597.41	2761.04	178.457	12292.4	5.17083	303.203	38.3889
62-2 20-21	-121	20	38441.1	18999.4	66310.5	6942.72	2593.64	182.822	11652.4	4.87	300.776	36.0179
62-2 22-23	-121	22	42402.4	21483.6	67597	7983.29	2848.21	172.859	12555.1	5.51307	321.116	40.6215
62-2 24-25	-121	24	37815.4	18725.9	64042	7037.55	2464.81	177.771	11256.1	4.84427	293.237	35.9315
62-2 26-27	-121	26	41712.5	21223.1	65588	7581.8	2828.67	174.887	12324	5.20196	295.707	38.7542
62-2 27-28	-121	28	42623.3	21894.1	65365.1	7849.8	2895.56	169.722	12249.6	5.32459	292.877	39.7753
63-2 0-1	-840	0	48835.2	25505.9	65838.3	9145.12	3224.76	203.132	12285.4	6.59017	321.206	54.8409
63-2 2-3	-840	2	53434.2	27714.1	69481	9203.45	3477.19	212.579	13055.9	7.32595	333.256	59.6579
63-2 4-5	-840	4	57618.2	30165.6	71492.1	9686.68	3795.38	211.69	14409.7	7.44488	315.403	60.4185
63-2 6-7	-840	6	60714.1	31513.4	71959.3	9996.35	3951.16	223.808	14683.2	7.91878	323.468	64.0732
63-2 8-9	-840	8	56849.8	29656	72237	9371.87	3798.01	216.212	14189.8	7.35124	327.238	61.0532
63-2 10-11	-840	10	57961.6	29775.6	71469	9484.46	3824.93	221.983	14216.1	7.44402	331.411	61.2414
63-2 12-13	-840	12	58698.4	29890.1	73974.4	9373.17	3852.02	217.277	14569.9	7.24067	336.768	58.3143
63-2 14-15	-840	14	55720.7	29238	75680.8	8905.35	3755.68	219.14	13753.4	6.9868	348.067	57.5438
63-2 16-17	-840	16	55830.9	28186.7	80792.5	8705.54	3849.03	222.192	14015.8	6.70676	358.019	55.2279
63-2 18-19	-840	18	54993.2	29688.5	77607.8	8361.67	3730.93	220.892	13998.2	6.70573	358.727	56.5648
63-2 20-21	-840	20	53570.2	31682.6	79561.3	8261.52	3669.79	221.013	13752.5	6.6371	380.946	56.1656
63-2 22-23	-840	22	50996.3	33047.4	77602.7	7957.72	3681.33	222.884	14084.4	6.197	384.484	60.6933
63-2 24-25	-840	24	50141.3	28606	84225	7494.88	3492.34	206.354	13738.9	5.79036	389.252	52.403
63-2 26-27	-840	26	50956.4	23988.7	86253.8	7443.69	3674.34	225.062	14005.6	6.28003	412.745	56.5219
63-2 28-29	-840	28	48733.5	22064.4	87238.6	6918.75	3518.75	228.14	13593.4	5.84526	422.19	50.9817
63-2 30-31	-840	30	45647.7	21557.7	87816.4	6613.25	3481.57	227.207	13603.4	5.29767	429.127	48.6167
63-2 32-33	-840	32	47247.7	21896.1	92072	6683.77	3489.51	230.809	13689.2	5.43053	426.556	47.6106
63-2 34-35	-840	34	39609.7	20848.7	92813.7	6422.95	3494.21	231.641	13150.9	3.85848	458.537	52.7322
64-2 0-1	-302	0	33755.9	15417.6	87432.3	5812.32	2421.8	207.776	11852.5	3.5137	440.731	31.2495
64-2 2-3	-302	2	33171.3	15760.1	87460.1	5569.77	2530.75	198.946	11503.5	3.59527	425.289	31.8237
64-2 4-5	-302	4	35244.1	17124.2	92192.4	6000.31	2781.88	198.876	12204.7	3.54631	439.56	32.9757
64-2 6-7	-302	6	30809.5	15425.9	86795.4	5551.92	2433.58	190.288	11171.3	3.29612	428.368	31.2706
64-2 8-9	-302	8	34417.6	15864.1	88758.8	5753.2	2611.5	190.581	11897.5	3.55223	424.118	31.392
64-2 10-11	-302	10	35154.1	15763.4	92418.7	5944.79	2594.68	194.235	12217	3.61731	429.445	31.624
64-2 12-13	-302	12	33946.5	14994.6	89853	5692.53	2591.88	192.183	11725.1	3.5781	461.121	31.4616
64-2 14-15	-302	14	35196.7	15301.5	82095	5600.87	2736.99	193.669	12011.6	3.59536	395.619	31.7583
65-2 0-1	-121	0	16777	14879.2	144694	8192.23	1215.2	91.9729	5733	2.5207	866.35	27.059
65-2 2-3	-121	2	22674.7	16901.5	109842	8125.38	1604.14	107.093	7221.68	2.63269	680.459	31.6268
65-2 4-5	-121	4	21898.3	18261.8	134933	8716.62	1490.96	92.092	6919.47	3.26224	819.381	34.3939
65-2 6-7	-121	6	20302.3	16099.6	119763	8034.3	1424.22	105.208	7050.36	2.9801	636.092	30.2441
65-2 8-9	-121	8	18388.1	14275.2	121735	7523.69	1358.16	102.621	6177.27	2.8893	756.067	28.8734
65-2 10-11	-121	10	21008.2	16184.1	128012	8675.83	1432.83	95.9315	7004.18	3.04699	732.284	31.4206
65-2 12-13	-121	12	23003.5	17033.6	117721	8257.22	1837.07	106.883	7550.66	3.36222	767.562	33.2933
65-2 14-15	-121	14	21788.2	16052.7	119826	8451.3	1567.74	102.938	7365.89	3.02439	648.019	30.5431
65-2 16-17	-121	16	21875.3	16688.1	122276	8899.57	1596.18	107.88	7302.85	2.9883	695.674	31.0849
65-2 18-19	-121	18	20133.1	15504.2	132768	8508.17	1440.5	95.9677	6585.58	2.95999	791.443	30.0226
65-2 20-21	-121	20	19661.4	17948.2	131534	8526.01	1493.51	90.5833	6413.94	2.9121	755.896	30.7661
66-2 0-1	-368	0	41809.4	21403.4	69993.2	8023.62	3133.38	196.683	12585.8	5.44578	382.268	44.1009
66-2 2-3	-368	2	41522.8	21236.2	73236.9	7472.01	3232.35	186.531	12387.7	5.4823	409.436	43.8871
66-2 4-5	-368	4	39247.4	20209.8	75838.4	6997.38	3044.81	181.091	12189.6	4.8692	422.787	41.6581
66-2 6-7	-368	6	40494.4	20673	79316.8	7121.12	3085.03	183.814	12693.9	4.96728	420.535	41.5152
66-2 8-9	-368	8	41072.2	20816.3	76938.3	7266.06	3217.3	190.246	13098.1	5.1941	411.904	44.3591
66-2 10-11	-368	10	38802.6	17849.6	65272.9	6373.82	2958.72	182.665	12116.5	4.88536	364.956	40.1508
66-2 12-13	-368	12	41266.4	18754.2	74389.2	6832.2	3133.44	196.035	13038.1	4.86761	405.085	40.5879
66-2 14-15	-368	14	41122	18982.8	76332.2	6905	3220.1	184.425	13200.8	4.74252	403.812	40.2591
67-2 0-1	-649	0	63336	30376	49180	11737	3832.3	210.67	11935.6	8.582	211.112	72.685
67-2 3-4	-649	3	63678	34954	48736	10726	3772.3	207.2	11998.2	8.693	214.022	73.515
67-2 7-8	-649	7	61718	31327	51702	10449	3730.7	200.43	12079.3	8.74	224.02	72.993
67-2 11-12	-649	11	62190	29558	51362	10395	3707.5	206.31	12348.4	8.766	222.306	74.302
67-2 15-16	-649	15	66580	30638	58811	11124	3938.6	203.22	13104.5	8.559	231.019	72.623
67-2 19-20	-649	19	59785	27344	53653	10022	3487	198.03	11372.7	7.928	219.076	65.95
67-2 23-24	-649	23	62540	29348	53582	10175	3938.6	204.26	12738.7	8.237	221.775	72.977
67-2 26-28	-649	26	62540	28312	53266	10484	3806.2	205.43	12447.6	8.51	227.125	71.545
67-2 31-32	-649	31	66260	30256	57716	11158	4003.5	209.24	13241.9	8.521	231.274	71.832
67-2 35-36	-649	35	62777	28770	53809	10655	3893.3	200.73	12788.2	8.342	220.614	70.117
67-2 39-40	-649	39	61996	27854	54523	10193	3711.1	203.57	12236.1	8.256	224.493	69.564
68-2 1-2	-1393	1	52870	29219	60294	9666	3769.5	234.23	11205.5	7.015	252.266	71.574
68-2 3-4	-1393	3	64169	30039	62691	11136	3906.6	243.58	11625.4	8.637	244.702	71.899
68-2 7-8	-1393	7	62540	29157	63989	10464	3721.9	251.1	11398.4	8.573	249.799	72.38
68-2 11-12	-1393	11	64210	29848	66871	10633	3848.1	256.9	11688.4	8.642	252.474	70.995
68-2 15-16	-1393	15	64366	30030	69009	10640	3881.3	260.81	11719.3	8.519	258.427	70.131
68-2 19-20	-1393	19	63629	29286	64632	10431	3868.3	268.41	11346.3	8.576	251.83	69.671
68-2 23-24	-1393	23	60755	29325	68611	9858	3751.6	257.3	11136.3	7.909	258.347	65.877
68-2 27-28	-1393	27	58638	27457	70332	9457	3532.1	252	11068.2	7.796	269.309	68.819
68-2 31-32	-1393	31	62062	29257	73656	9872	3707.5	263.74	11928.4	7.822	274.353	64.42
68-2 35-36	-1393	35	58509	26782	78494	9033	3443.8	268.6	10734.1	7.679	285.636	67.537
68-2 39-40	-1393	39	65516	26491	89692	9316	3651.2	253.4	11153.6	7.531	279.349	64.038
