# Supplementary material for: Inorganic and organic geochemical fingerprinting of sediment sources and ocean circulation on a complex continental margin (São Paulo Bight, Brazil)
Source: Copernicus journal article supplement (doi:10.5194/os-2016-86), 2016-11-21
Supplement: Supplementary file 3 [file SuppMat3.xlsx]

## Sheet: Plan1
Supp. Mat. 3. Contents (%) of CaCO3, organic Carbon and total Nitrogen, and stable isotopes of Carbon and Nitrogen
Sample	Water Depth	Core Depth	% CaCO3	% Corg Total	δ13C	% N Total	δ15N	N/C
60-0	-16	0	27.0977	0.225825	-23.726	0.0677928	6.25158	0.3002
61-0	-60	0	14.8681	0.575891	-22.175	0.204223	5.74893	0.35462
61-2 / 0-1	-60	1	18.6153	0.36288	-22.647	0.159715	5.17908	0.440132
61-2 / 1-2	-60	2	18.1515	0.680321	-22.766	0.164488	4.11699	0.24178
61-2 / 2-3	-60	3	18.1317	0.829359	-22.411	0.182505	4.5477	0.220055
61-2 / 3-4	-60	4	21.929	0.621812	-22.857	0.207723	4.38583	0.334061
61-2 / 4-5	-60	5	19.4903	0.826407	-22.167	0.189857	5.28415	0.229738
61-2 / 5-6	-60	6	17.3896	0.911461	-22.228	0.176327	5.41857	0.193456
61-2 / 6-7	-60	7	20.2741	1.13642	-22.64	0.160896	6.03196	0.141581
61-2 / 7-8	-60	8	18.3753	0.974298	-22.437	0.141465	5.37218	0.145197
61-2 / 8-9	-60	9	15.2976	0.610498	-23.29	0.149009	5.51891	0.244078
61-2 / 9-10	-60	10	15.6012	0.657263	-23	0.177134	5.4924	0.269502
61-2 / 10-11	-60	11	15.1935	0.529038	-22.356	0.171366	4.79949	0.323921
61-2 / 11-12	-60	12	16.6717	0.703302	-23.233	0.178655	3.62287	0.254024
61-2 / 12-13	-60	13	16.4038	0.630527	-23.493	0.143608	4.63857	0.227758
61-2 / 13-14	-60	14	15.6007	2.5848	-23.66	0.170202	4.57799	0.0658472
61-2 / 14-15	-60	15	14.6802	0.914961	-22.957	0.191154	5.81425	0.20892
61-2 / 15-16	-60	16	15.114	0.775622	-23.009	0.185312		0.23892
61-2 / 16-17	-60	17	17.1158	0.812801	-22.88	0.146325	5.24913	0.180026
61-2 / 17-18	-60	18	16.5029	0.910442	-22.256	0.128181	5.42898	0.140789
62-2 / 0-1	-121	1	30.8221	0.432248	-21.955	0.122294	5.88335	0.282925
62-2 / 1-2	-121	2	29.8251	0.456616	-21.763	0.124163	5.43371	0.27192
62-2 / 2-3	-121	3	28.4425	0.34871	-21.395	0.109635	7.09878	0.314402
62-2 / 3-4	-121	4	27.2763	0.2099	-21.763	0.101889	5.62019	0.485418
62-2 / 4-5	-121	5	26.1699	0.170743	-22.988	0.101196	4.68022	0.592683
62-2 / 5-6	-121	6	26.6122	0.173781	-22.753	0.102606	6.56111	0.590436
62-2 / 6-7	-121	7	25.8978	0.236229	-22.491	0.108044		0.457371
62-2 / 7-8	-121	8	25.2173	0.150964	-22.589	0.0949388		0.628882
62-2 / 8-9	-121	9	24.587	0.230934	-21.754	0.103909	6.15078	0.449952
62-2 / 9-10	-121	10	26.1994	0.224846	-22.022	0.104454	5.0901	0.464557
62-2 / 10-11	-121	11	25.3627	0.17785	-22.577	0.104143	8.38711	0.585568
62-2 / 11-12	-121	12	24.5145			0.0888309	8.1798
62-2 / 12-13	-121	13	23.9606	0.149341	-22.858
62-2 / 13-14	-121	14	24.8276	0.181412	-21.887	0.113	5.01342	0.622888
62-2 / 14-15	-121	15	23.96	0.214349	-21.791	0.122445	4.61206	0.571241
62-2 / 15-16	-121	16	25.5844	0.230286	-21.933	0.101468	5.54825	0.440617
62-2 / 16-17	-121	17	25.6947	0.337044	-21.736	0.108407	6.21277	0.32164
62-2 / 17-18	-121	18	25.3761	0.34324	-21.507	0.111686	6.27335	0.325387
62-2 / 18-19	-121	19	25.9106	0.27544	-22.109	0.101985	5.08536	0.370261
62-2 / 19-20	-121	20	26.4547	0.416938	-20.96	0.113192	4.83925	0.271484
62-2 / 20-21	-121	21	27.2655	0.457639	-22.073	0.115572	5.85968	0.252539
62-2 / 21-22	-121	22	27.9469	0.171184	-23.111	0.144201	5.57192	0.842378
62-2 / 22-23	-121	23	25.9784			0.109979	6.55449
62-2 / 23-24	-121	24	29.2878	0.524857	-22.001	0.128254	5.02005	0.24436
62-2 / 24-25	-121	25	25.7591	0.4439	-21.496	0.112634	6.04238	0.253738
62-2 / 25-26	-121	26	27.4348	0.47907	-21.519	0.127631	5.80573	0.266415
62-2 / 26-27	-121	27	27.2196	0.656601	-21.967	0.125662	4.57704	0.191382
62-2 / 27-28	-121	28	27.7745	0.468725	-20.757	0.110158	5.87578	0.235016
62-2 / 28-29	-121	29	28.4916	0.163204	-23.268	0.124382	6.06699	0.762127
62-2 / 29-30	-121	30	27.9882	0.488138	-21.342	0.137195	6.29891	0.281058
62-2 / 30-31	-121	31	28.0476	0.301856	-21.684	0.12979	6.32162	0.429972
62-2 / 31-32	-121	32	28.5475	0.418113	-21.576	0.123461	6.21939	0.29528
62-2 / 32-33	-121	33	30.212	0.347575	-21.509	0.110936	5.90228	0.319172
62-2 / 33-34	-121	34	29.155			0.121423	6.23738
63-2 / 0-1	-840	1	34.5211	0.904621	-21.473	0.14059	4.93675	0.155413
63-2 / 1-2	-840	2	27.5763	0.931519	-21.718	0.153773	4.23153	0.165077
63-2 / 2-3	-840	3	35.3632	0.891118	-21.505	0.140818	4.7834	0.158024
63-2 / 3-4	-840	4	35.7278	0.665442	-21.761	0.124547	5.15636	0.187164
63-2 / 4-5	-840	5	33.7707	0.733686	-22.1	0.109824	5.61167	0.149688
63-2 / 5-6	-840	6	33.4735	0.670271	-22.032	0.110593	6.00167	0.164997
63-2 / 6-7	-840	7	32.8768	0.675318	-21.927	0.0988275	5.67604	0.146342
63-2 / 7-8	-840	8	33.0768	0.680262	-21.759	0.0982343	5.15731	0.144407
63-2 / 8-9	-840	9	32.872	0.475784	-23.036	0.0928106	6.19857	0.195069
63-2 / 9-10	-840	10	35.2835	0.399561	-21.26	0.0840045	6.16828	0.210242
63-2 / 10-11	-840	11	35.4848	0.428118	-21.301	0.0786221	5.95718	0.183646
63-2 / 11-12	-840	12	32.9774	0.466073	-23.051	0.112698	5.2993	0.241803
63-2 / 12-13	-840	13	32.4648	0.443998	-21.856	0.0715457	5.89565	0.16114
63-2 / 13-14	-840	14	36.6893	0.355508	-21.162	0.0686374	5.76597	0.193068
63-2 / 14-15	-840	15	32.2046	0.274794	-22.091	0.0682048	5.17056	0.248203
63-2 / 15-16	-840	16	32.9449	0.364109	-21.881	0.0634429	5.50376	0.174242
63-2 / 16-17	-840	17	32.5027	0.378126	-22.022	0.0629251	4.8383	0.166413
63-2 / 17-18	-840	18	43.0782	0.394093	-21.799	0.0783754	5.88997	0.198875
63-2 / 18-19	-840	19	33.0384	0.461659	-21.69	0.0844144	6.08024	0.18285
63-2 / 19-20	-840	20	33.6057	0.333104	-21.91	0.0725569	5.98369	0.217821
63-2 / 20-21	-840	21	33.27	0.495406	-21.888	0.0649088	5.94677	0.131021
63-2 / 21-22	-840	22	33.2735	0.509893	-22.852	0.0644606	5.67604	0.12642
63-2 / 22-23	-840	23	33.6522	0.33875	-21.59	0.0676566	6.17395	0.199724
63-2 / 23-24	-840	24	32.5605	0.396601	-22.189	0.0635986	6.12095	0.160359
63-2 / 24-25	-840	25	34.3473	0.383833	-22.418	0.0609518	7.09689	0.158798
63-2 / 25-26	-840	26	34.2923	0.369155	-22.534	0.0600642	5.11376	0.162707
63-2 / 26-27	-840	27	35.4855	0.244937	-22.592	0.0560865	6.13988	0.228984
63-2 / 27-28	-840	28	34.579	0.274452	-22.743	0.0556012	6.28187	0.20259
63-2 / 28-29	-840	29	36.3583	0.264194	-22.635	0.0466133	7.15179	0.176436
63-2 / 29-30	-840	30	36.642	0.225378	-22.808	0.0538193	8.04917	0.238796
63-2 / 30-31	-840	31	38.271	0.313543	-21.707	0.0520199	5.09294	0.16591
63-2 / 31-32	-840	32	35.6935	0.237334	-22.097	0.0423222	6.3576	0.178323
63-2 / 32-33	-840	33	36.4053	0.226726	-22.507	0.0444337	7.74058	0.19598
64-2 / 0-1	-302	1	34.1627			0.0294834	8.53288
64-2 / 1-2	-302	2	34.8786	0.0789984	-23.753	0.0337679	7.01832	0.42745
64-2 / 2-3	-302	3	33.8455	0.0731467	-23.811	0.0367561	6.87633	0.502498
64-2 / 3-4	-302	4	33.5132			0.0356341	5.44318
64-2 / 4-5	-302	5	37.0345	0.0876985	-22.925	0.0321782	5.49998	0.366919
64-2 / 5-6	-302	6	36.0691	0.0927629	-23.577	0.0362552	5.76502	0.390837
64-2 / 6-7	-302	7	36.6673	0.0815072	-23.351	0.0371475	4.42369	0.455757
64-2 / 7-8	-302	8	36.3329	0.071294	-24.075	0.0320571	5.60032	0.449646
64-2 / 8-9	-302	9	35.4609			0.0316811	4.00151
64-2 / 9-10	-302	10	34.9191	0.0672686	-22.574	0.0319867	5.3542	0.475507
64-2 / 10-11	-302	11	35.2395			0.0341488	3.48561
64-2 / 11-12	-302	12	35.9517			0.0315533
64-2 / 12-13	-302	13	33.3935	0.075206	-23.333	0.0324764	5.63061	0.431832
64-2 / 13-14	-302	14	33.3031	0.0774205	-23.012	0.0287772	5.854	0.3717
64-2 / 14-15	-302	15	34.2917			0.0319774	5.0617
64-2 / 15-16	-302	16	33.5218	0.13872	-22.933	0.0320059	5.77165	0.230723
64-2 / 16-17	-302	17	34.4052	0.169411	-22.309	0.0274694	4.44546	0.162147
64-2 / 17-18	-302	18	33.9778	0.167657	-22.604	0.0293361	5.08253	0.174977
64-2 / 18-19	-302	19	34.9127	0.0886204	-23.337	0.0286007	4.0176	0.322733
64-2 / 19-20	-302	20	35.7642	0.0637673	-24.923	0.0326682	6.47497	0.512303
64-2 / 20-21	-302	21	34.2514	0.133797	-22.325	0.0334778	5.18192	0.250213
65-2 / 0-1	-121	1	46.4536			0.0717549	8.3038
65-2 / 1-2	-121	2	46.9244			0.0633361	6.1626
65-2 / 2-3	-121	3	45.3179			0.0703068	5.60032
65-2 / 3-4	-121	4	48.4682			0.0699548	6.3699
65-2 / 4-5	-121	5	59.4295	0.108595	-21.204	0.0625446	6.66429	0.575944
65-2 / 5-6	-121	6	52.5551			0.0680529	6.79492
65-2 / 6-7	-121	7	49.9645			0.061521	6.32825
65-2 / 7-8	-121	8	57.504			0.0630748	6.16449
65-2 / 8-9	-121	9	53.58			0.0646486	7.41305
65-2 / 9-10	-121	10	50.6134			0.0595362	5.89281
65-2 / 10-11	-121	11	49.2835			0.0596281
65-2 / 11-12	-121	12	49.5012			0.0576956	7.8305
65-2 / 12-13	-121	13	49.5249	0.125237	-22.026	0.056328	6.5649	0.449769
65-2 / 13-14	-121	14	46.0056			0.0585915	8.96642
65-2 / 14-15	-121	15	52.471			0.0585083	8.42024
65-2 / 15-16	-121	16	45.2868			0.0581532
65-2 / 16-17	-121	17	52.227			0.061219	6.83373
66-2 / 0-1	-368	1	31.1158	0.562743	-22.103	0.104227	6.29701	0.185213
66-2 / 1-2	-368	2	29.7815	0.460208	-22.401	0.0910086	6.83279	0.197755
66-2 / 2-3	-368	3	28.4352	0.566989	-22.827	0.0796711	6.49201	0.140516
66-2 / 3-4	-368	4	30.2153	0.285602	-22.234	0.0864527	6.39451	0.302703
66-2 / 4-5	-368	5	29.9622	0.436596	-22.682	0.078717	6.43806	0.180297
66-2 / 5-6	-368	6	29.6314	0.434804	-22.62	0.071368	6.83657	0.164138
66-2 / 6-7	-368	7	29.2685	0.505501	-22.202	0.0732736	6.56017	0.144952
66-2 / 7-8	-368	8	28.895	0.338618	-22.504	0.074176	7.15842	0.219055
66-2 / 8-9	-368	9	28.1655	0.429007	-22.293	0.0656944	7.48784	0.153131
66-2 / 9-10	-368	10	27.6301	0.419634	-22.212	0.0710122	7.40832	0.169224
66-2 / 10-11	-368	11	26.5657	0.457187	-22.333	0.0786175		0.171959
66-2 / 11-12	-368	12	30.3063	0.441636	-22.641	0.0765925	6.88201	0.173429
66-2 / 12-13	-368	13	30.6655	0.281613	-21.653	0.0726473	7.3307	0.257968
66-2 / 13-14	-368	14	27.8782	0.266976	-21.805	0.06566	7.73584	0.24594
66-2 / 14-15	-368	15	28.7054	0.231076	-22.027	0.0633842	6.75611	0.274301
66-2 / 15-16	-368	16	28.8827	0.260185	-21.609	0.0670083	7.1499	0.257541
66-2 / 16-17	-368	17	31.2264	0.287617	-22.773	0.0646224	7.50014	0.224682
66-2 / 17-18	-368	18	31.1664	0.464145	-22.36	0.0641959	6.63211	0.13831
66-2 / 18-19	-368	19	30.836	0.342569	-22.626	0.0612941	7.13759	0.178925
66-2 / 19-20	-368	20	33.0309	0.262251	-23.085	0.0601232	7.07512	0.229258
66-2 / 20-21	-368	21	33.5932	0.424406	-22.059	0.0634877	7.25024	0.149592
66-2 / 21-22	-368	22	34.4658	0.410244	-22.215	0.0637664	6.90568	0.155435
66-2 / 22-23	-368	23	34.5276	0.432707	-21.974	0.0630501	6.99276	0.145711
67-2 / 0-1	-649	1	31.4546	1.09803	-21.818	0.183037	4.53255	0.166696
67-2 / 1-2	-649	2	29.4251	1.03357	-21.776	0.182492	4.75405	0.176565
67-2 / 2-3	-649	3	27.4358	0.974755	-21.81	0.161761	3.60867	0.16595
67-2 / 3-4	-649	4	27.0483	0.924444	-21.465	0.160632	4.84304	0.173761
67-2 / 4-5	-649	5	28.7677	1.00737	-21.616	0.152995	5.59085	0.151876
67-2 / 5-6	-649	6	28.3784	1.00571	-21.686	0.164996	5.16961	0.164059
67-2 / 6-7	-649	7	28.2847	1.02316	-21.539	0.15096	5.07401	0.147542
67-2 / 7-8	-649	8	28.3124	0.999898	-21.335	0.169106	5.72811	0.169123
67-2 / 8-9	-649	9	28.2095	0.959337	-21.453	0.139547	5.0901	0.145462
67-2 / 9-10	-649	10	31.877	0.939075	-21.671	0.149377	5.62777	0.159069
67-2 / 10-11	-649	11	28.1781	0.9678	-21.384	0.144423	4.72471	0.149228
67-2 / 11-12	-649	12	27.4926	0.843479	-21.452	0.151453	5.17908	0.179557
67-2 / 12-13	-649	13	26.5386	0.896743	-21.348	0.1412	5.41005	0.157458
67-2 / 13-14	-649	14	27.7208	0.857697	-21.243	0.14634	5.73095	0.17062
67-2 / 14-15	-649	15	26.4908	1.01316	-21.527	0.14721	5.62019	0.145297
67-2 / 15-16	-649	16	26.9162	0.987447	-21.498	0.143408	5.97801	0.145231
67-2 / 16-17	-649	17	27.2976	0.864964	-21.653	0.131134	5.72905	0.151607
67-2 / 17-18	-649	18	27.8545	0.945202	-21.284	0.136971	6.18342	0.144912
67-2 / 18-19	-649	19	27.0087	0.958848	-21.304	0.127764	5.65048	0.133248
67-2 / 19-20	-649	20	45.4345	0.7005	-21.174	0.141254	5.84832	0.201647
67-2 / 20-21	-649	21	55.895	0.571314	-21.592	0.133505	4.8809	0.23368
67-2 / 21-22	-649	22	26.1725	0.844151	-21.559	0.131422	5.16204	0.155686
67-2 / 22-23	-649	23	26.1147	0.851809	-21.105	0.131689	5.93447	0.154599
67-2 / 23-24	-649	24	26.662	0.957277	-21.589	0.119243	5.38354	0.124565
67-2 / 24-25	-649	25	27.0239	0.884385	-21.383	0.138548	5.71675	0.15666
67-2 / 25-26	-649	26	25.8774	0.850907	-21.399	0.133032	6.19857	0.156341
67-2 / 26-27	-649	27	27.2137	0.942378	-21.333	0.131851	5.41762	0.139913
67-2 / 27-28	-649	28	30.1568	0.88631	-21.327	0.131797	6.0509	0.148703
67-2 / 28-29	-649	29	26.8963	0.841424	-21.327	0.135381	5.92311	0.160895
67-2 / 29-30	-649	30	27.2221	0.888299	-21.573	0.137786	5.83413	0.155112
67-2 / 30-31	-649	31	26.1425	0.90495	-21.698	0.12862	4.80233	0.14213
67-2 / 31-32	-649	32	26.7866	0.930035	-21.841	0.144974	4.80044	0.15588
67-2 / 32-33	-649	33	26.5662	0.91434	-21.706	0.130644	5.86252	0.142883
67-2 / 33-34	-649	34	27.0366	0.929832	-21.513	0.130353	4.89415	0.14019
67-2 / 34-35	-649	35	25.7288	0.900408	-21.466	0.129792	5.68267	0.144148
67-2 / 35-36	-649	36	24.3025	0.892649	-21.521	0.12698	5.65143	0.142251
67-2 / 36-37	-649	37	26.1981	0.869607	-21.544	0.13054	5.73568	0.150114
67-2 / 37-38	-649	38	26.0162	0.87317	-21.409	0.126918	5.61735	0.145353
67-2 / 38-39	-649	39	26.358	0.862806	-21.538	0.130824	5.59274	0.151626
68-2 / 0-1	-1393	1	39.7423	1.07514	-22.619	0.132941	4.00151	0.123649
68-2 / 1-2	-1393	2	37.2156	0.92292	-22.887	0.127951	2.84098	0.138637
68-2 / 2-3	-1393	3	35.3573	0.830974	-22.355	0.114848	3.93714	0.138209
68-2 / 3-4	-1393	4	32.3903	0.873075	-21.1	0.115102	3.89738	0.131836
68-2 / 4-5	-1393	5	32.2597	0.837817	-21.171	0.11003	4.46156	0.131329
68-2 / 5-6	-1393	6	32.4908	0.819577	-21.326	0.10493	4.1558	0.12803
68-2 / 6-7	-1393	7	31.8649	0.787806	-21.13	0.09727	4.42937	0.123469
68-2 / 7-8	-1393	8	31.7932	0.7719	-21.13
68-2 / 8-9	-1393	9	30.8986	0.675937	-21.177
68-2 / 9-10	-1393	10	30.6488	0.675579	-21.247	0.121079	5.59558	0.179222
68-2 / 10-11	-1393	11	30.7448	0.67808	-21.13	0.116134	6.40493	0.171269
68-2 / 11-12	-1393	12	30.8976	0.735632	-21.823	0.113255	6.07646	0.153956
68-2 / 12-13	-1393	13	30.1408	0.680305	-20.993	0.108941	6.81764	0.160135
68-2 / 13-14	-1393	14	29.2037	0.636947	-21.092	0.108471	6.17774	0.170298
68-2 / 14-15	-1393	15	31.397	0.633689	-21.163	0.112411	5.65616	0.177392
68-2 / 15-16	-1393	16	29.3006	0.684881	-21.324	0.110501	5.93068	0.161343
68-2 / 16-17	-1393	17	30.8445	0.721981	-21.361	0.110983	6.50716	0.15372
68-2 / 17-18	-1393	18	28.8992	0.631685	-21.188	0.113039	6.81575	0.178948
68-2 / 18-19	-1393	19	31.2942	0.580864	-21.394	0.107552	6.31216	0.185159
68-2 / 19-20	-1393	20	30.8532	0.596068	-21.275	0.107227	7.8324	0.179891
68-2 / 20-21	-1393	21	31.3035	0.55452	-20.848	0.10372	7.1092	0.187044
68-2 / 21-22	-1393	22	29.8355	0.58276	-21.207	0.107029	7.28432	0.183659
68-2 / 22-23	-1393	23	31.07	0.573092	-21.319	0.103587	6.43616	0.18075
68-2 / 23-24	-1393	24	29.8361	0.580994	-20.857	0.102383	6.15313	0.176221
68-2 / 24-25	-1393	25	32.3353	0.548002	-21.282	0.104792	7.18114	0.191225
68-2 / 25-26	-1393	26	32.8641	0.581565	-21.113	0.103645	6.44752	0.178217
68-2 / 26-27	-1393	27	32.9421	0.52567	-20.899	0.0998479	6.42859	0.189944
68-2 / 27-28	-1393	28	32.9699	0.57101	-21.093	0.0982076	7.88162	0.171989
68-2 / 28-29	-1393	29	33.47	0.469952	-21.211	0.100296	6.40966	0.213417
68-2 / 29-30	-1393	30	32.2785	0.592802	-21.263	0.100195	7.42915	0.16902
68-2 / 30-31	-1393	31	31.5119	0.48053	-21.284	0.10319	7.02211	0.214742
68-2 / 31-32	-1393	32	30.0689	0.592775	-21.076	0.103967	7.34395	0.17539
68-2 / 32-33	-1393	33	32.6704	0.525946	-21.268	0.0996509	7.39034	0.18947
68-2 / 33-34	-1393	34	32.5752	0.417527	-21.778	0.0992884	7.11772	0.237801
68-2 / 34-35	-1393	35	32.6887	0.345207	-21.667	0.0984115	6.81575	0.28508
68-2 / 35-36	-1393	36	33.6999	0.362341	-21.248	0.102759	7.3875	0.283599
68-2 / 36-37	-1393	37	31.9651	0.506368	-21.276	0.0969804	7.68757	0.191522
68-2 / 37-38	-1393	38	33.2018	0.384383	-21.841	0.0970297	6.93975	0.25243
68-2 / 38-39	-1393	39	32.4928	0.388663	-21.512	0.0976724	7.5683	0.251304
