# Supplementary material for: Inorganic and organic geochemical fingerprinting of sediment sources and ocean circulation on a complex continental margin (São Paulo Bight, Brazil)
Source: Copernicus journal article supplement (doi:10.5194/os-2016-86), 2016-11-21
Supplement: Supplementary file 4 [file SuppMat4.xlsx]

## Sheet: Plan1
Supp. Mat. 4. Molecular parameters determined in this work
Sample	Water Depth	Core Depth	TAR	TI	ACL	Pri/Phy	AI	CPI
61_0_1.D	-60	1	8.52698	197.155	29.3254	2.81506	0.502238	3.40174
61_5_6.D	-60	5	18.029	150.495	29.1319	2.36228	0.386182	4.35881
61_10_11	-60	10	19.975	282.025	29.1128	1.70694	0.360708	4.93368
61_17_18	-60	17	16.9515	150.311	29.127	1.5603	0.377424	4.19719
62_0_1	-121	1	3.906	45.904	30.8355	1.59852	0.556487	3.54573
62_5_6.D	-121	5	4.28115	82.6863	30.5657	1.59463	0.520503	3.24846
62_10_11	-121	10	4.37668	78.4293	30.2918	1.41865	0.516	2.89458
62_20_21	-121	20	2.73451	38.9252	30.1538	1.27617	0.511085	3.97946
62_30_31	-121	30	4.12488	41.3431	29.7975	1.65767	0.249825	3.6793
62_33_34	-121	33	4.9607	51.3232	29.9907	1.72768	0.533465	3.52544
62_33_34A.D	-121	34	4.48115	46.2307	28.9455	1.63273	0.28928	2.6554
63_0_1.D	-840	0	2.27274	30.4963	29.1962	1.39219	0.626655	1.36463
63_5_6.D	-840	5	2.52746	16.1588	30.894	1.14338	0.6524	1.71054
63_10_11.D	-840	10	2.66006	14.6539	28.8572	1.35291	0.609072	2.38129
63_20_21.D	-840	20	4.2051	7.70465	29.2283	1.05315	0.595337	2.01833
63_30_31.D	-840	30	4.12488	39.7632	29.7975	1.65767	0.249825	3.6793
63_32_33.D	-840	32	1.57129	22.5031	29.7363	1.271	0.578525	3.34186
64_0_1.D	-302	0	1.51862	118.604	26.9762	1.03412	0.603824	1.75622
64_5_6.D	-302	5	2.52858	76.1615	29.4593	1.14705	0.559405	1.94352
64_10_11.D	-302	10	2.40428	59.4106	29.9844	1.07313	0.590867	1.75276
64_20_21.D	-302	20	1.32991	52.2125	30.851	1.46701	0.589337	2.75406
66_0_1.D	-368	0	4.7546	30.8118	30.3315	1.73811	0.63523	2.08194
66_5_6.D	-368	5	3.82559	20.4661	30.4049	1.48894	0.637112	2.32611
66_10_11.D	-368	10	3.69076	15.0873	29.9785	1.16414	0.58568
66_20_21.D	-368	20	2.35238	18.7394	28.738	1.13821	0.568999
66_22_23.D	-368	22	1.5361	25.2364	28.069	1.0585	0.573622
67_0_1.D	-649	0	1.09264	11.2445	29.7301	1.23073	0.64514	2.07067
67_5_6.D	-649	5	1.36576	13.217	30.9528		0.632385	2.06656
67_10_11.D	-649	10	2.95976	9.88073	30.4943	1.36273	0.601491	3.05224
67_21_21.D	-649	21	2.31467	15.6639	31.0233	1.35569	0.561727	4.13674
67_30_31.D	-649	30	2.31604	7.54225	29.8878	1.22277	0.587199	1.9735
67_37_38.D	-649	37	3.74501	19.1427	28.1588	1.07222	0.474766	1.39682
67_38_39.D	-649	38	1.8179	4.44274	29.7904	1.43825	0.586858	3.26257
68_0_1.D	-1393	0	3.0773	12.0338	30.8649	1.14422	0.611367	1.92435
68_5_6.D	-1393	5	2.35093	7.51901	31.0977	1.07506	0.603832	2.64143
68_10_11.D	-1393	10	1.08873	6.58154	30.2184	1.31823	0.605626	1.04663
68_20_21.D	-1393	20	2.46562	9.03065	29.3487	1.23238	0.594566	2.60146
68_30_31.D	-1393	30	2.27742	9.65933	30.3381	1.12563	0.621552
			1.08873	4.44274	29.7812	2.81506	0.556487
			4.7546		0.910736	1.27617	0.249825
